# Supplementary material for: Transforming Growth Factor-β Concerning Malarial Infection and Severity: A Systematic Review and Meta-Analysis
Source: MDPI journal article supplement (doi:10.3390/tropicalmed7100299), 2022-10-13
Supplement: s1 [file s1]

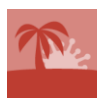

Systematic Review

# Transforming Growth Factor- $\beta$ Concerning Malarial Infection and Severity: A Systematic Review and Meta-Analysis

Kwuntida Uthaisar Kotepui <sup>1,†</sup>, Pattamaporn Kwankaew <sup>1,2†</sup>, Frederick Ramirez Masangkay <sup>3</sup>,  
Aongart Mahittikorn <sup>4,\*</sup> and Manas Kotepui <sup>1,\*</sup>

<sup>1</sup> Medical Technology, School of Allied Health Sciences, Walailak University, Tha Sala 80160, Thailand;

<sup>4</sup> Research Excellence Center for Innovation and Health Product, Walailak University, Tha Sala 80161, Thailand

<sup>2</sup> Department of Medical Technology, Faculty of Pharmacy, University of Santo Tomas, Manila 1008, Philippines;

<sup>3</sup> Department of Protozoology, Faculty of Tropical Medicine, Mahidol University, Bangkok 10400, Thailand

\* Correspondence: aongart.mah@mahidol.ac.th (A.M.); manas.ko@wu.ac.th (M.K.)

† These authors contributed equally to this work.

Table S1. Search term.

| Databases            | Search terms/Search strategy                                                                                                                                                                                                                                                                                      | Date              |
|----------------------|-------------------------------------------------------------------------------------------------------------------------------------------------------------------------------------------------------------------------------------------------------------------------------------------------------------------|-------------------|
| MEDLINE (via PubMed) | ("Milk Growth Factor" OR "TGF-beta" OR TGFbeta OR "Platelet Transforming Growth Factor" OR "Bone-Derived Transforming Growth Factor" OR "Bone Derived Transforming Growth Factor" OR "transforming growth factor") AND (malaria OR plasmodium)<br>Search results: 201                                             | 1 to 7 March 2022 |
| Scopus               | ("Milk Growth Factor" OR "TGF-beta" OR TGFbeta OR "Platelet Transforming Growth Factor" OR "Bone-Derived Transforming Growth Factor" OR "Bone Derived Transforming Growth Factor" OR "transforming growth factor") AND (malaria OR plasmodium)<br>Search option: Title, abstract, keywords<br>Search results: 397 | 1 to 7 March 2022 |
| Embase               | ("Milk Growth Factor" OR "TGF-beta" OR TGFbeta OR "Platelet Transforming Growth Factor" OR "Bone-Derived Transforming Growth Factor" OR "Bone Derived Transforming Growth Factor" OR "transforming growth factor") AND (malaria OR plasmodium)<br>Search option: All fields<br>Search results: 429                | 1 to 7 March 2022 |
