# Supplementary material for: Transforming Growth Factor-β Concerning Malarial Infection and Severity: A Systematic Review and Meta-Analysis
Source: MDPI journal article supplement (doi:10.3390/tropicalmed7100299), 2022-10-13
Supplement: s1 [file s1]

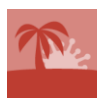

# Transforming Growth Factor- $\beta$ Concerning Malarial Infection and Severity: A Systematic Review and Meta-Analysis

Kwuntida Uthaisar Kotepui <sup>1,†</sup>, Pattamaporn Kwankaew <sup>1,2†</sup>, Frederick Ramirez Masangkay <sup>3</sup>,  
Aongart Mahittikorn <sup>4,\*</sup> and Manas Kotepui <sup>1,\*</sup>

<sup>1</sup> Medical Technology, School of Allied Health Sciences, Walailak University, Tha Sala 80160, Thailand;

<sup>4</sup> Research Excellence Center for Innovation and Health Product, Walailak University, The Sala, 80161, Thailand

<sup>2</sup> Department of Medical Technology, Faculty of Pharmacy, University of Santo Tomas, Manila 1008, Philippines;

<sup>3</sup> Department of Protozoology, Faculty of Tropical Medicine, Mahidol University, Bangkok 10400, Thailand

\* Correspondence: aongart.mah@mahidol.ac.th (A.M.); manas.ko@wu.ac.th (M.K.)

† These authors contributed equally to this work.

**Table S3.** Quality of the included studies.

|                                          | Study                      | Score(out of 22) | Score (percentage) | Quality |
|------------------------------------------|----------------------------|------------------|--------------------|---------|
| <b>Case-control studies</b>              | Bwanika et al., 2018       | 20               | 91                 | High    |
|                                          | Chaiyaroj et al., 2003     | 18               | 82                 | High    |
|                                          | Nsubuga et al., 2019       | 21               | 96                 | High    |
| <b>Cross-sectional studies</b>           | Hojo-Souza et al., 2017    | 18               | 82                 | High    |
|                                          | Awandare et al., 2006      | 21               | 96                 | High    |
|                                          | Hanisch et al., 2015       | 20               | 91                 | High    |
| <b>Prospective observational studies</b> | Musumeci et al., 2003      | 18               | 82                 | High    |
|                                          | Olupot-Olupot et al., 2013 | 20               | 91                 | High    |
|                                          | Perkins et al., 2000       | 19               | 86                 | High    |
|                                          | Prakash et al., 2006       | 19               | 86                 | High    |
|                                          | Wenisch et al., 1995       | 18               | 82                 | High    |

STROBE: Strengthening the Reporting of Observational Studies in Epidemiology.
