# Supplementary material for: Transforming Growth Factor-β Concerning Malarial Infection and Severity: A Systematic Review and Meta-Analysis
Source: Trop Med Infect Dis. 2022 Oct 13;7(10):299. doi: 10.3390/tropicalmed7100299 (PMC9612234; doi:10.3390/tropicalmed7100299)
Supplement: Supplementary file 1 [file tropicalmed-07-00299-s001.zip]

Archive with 6 entries (6 files):
- Supplementary Figure S1. Uncomplicated_Pf_children vs controls.tif
- Supplementary Figure S2. Uncomplicated_Pv_adults vs controls.tif
- Supplementary Figure S3. Severe vs uncomplicated_Pf_children.tif
- Table S1. Search term.pdf
- Table S2. Details of the included studies.xlsx
- Table S3. Quality the included studies.pdf
