# Supplementary material for: Transforming Growth Factor-β Concerning Malarial Infection and Severity: A Systematic Review and Meta-Analysis
Source: Trop Med Infect Dis. 2022 Oct 13;7(10):299. doi: 10.3390/tropicalmed7100299 (PMC9612234; doi:10.3390/tropicalmed7100299)
Supplement: Supplementary file 1 [file tropicalmed-07-00299-s001.zip › Table S2. Details of the included studies.xlsx]

## Sheet: Sheet1
No.	Authors	Study design	Study location (Year)	Year of experiment	Participants (number)	Plasmodium spp.	Mean age	Age (years)	Male%	TGF-beta (mean±SD)(pg/mL)	Parasite density	Method for malaria	Method for TGF-beta
1	Chaiyaroj et al., 2003	Case-control study	Thailand, Tanzania,	1998-2002	Cerebral malaria (Thailand) (27), Cerebral malaria (Tanzania) (28), severe malaria (17), uncomplicated malaria (22), healthy controls (28)	P. falciparum	Cerebral malaria (Thailand) (27): 29.2 ± 12.5, Cerebral malaria (Tanzania) (28): 1.3 ± 1.3, severe malaria (17): 23.7 ± 6.2, uncomplicated malaria (22): 25.4 ± 11.8, healthy controls (28): 12.8 ± 9.6	All age groups	Cerebral malaria (Thailand) (27): 74.1, Cerebral malaria (Tanzania) (28): 66.7, severe malaria (17): 58.8, uncomplicated malaria (22): 81.8, healthy controls (28): 42.9	Cerebral malaria (Thailand) (27): 12.9 ± 0.9, Cerebral malaria (Tanzania) (28): 17.9 ± 1.5, severe malaria (17): 26.2 ± 1.5, uncomplicated malaria (22):32.6 ± 2.5, healthy controls (28): 47.8 ± 2.3	Cerebral malaria (Thailand) (27): 170142 ± 180158, Cerebral malaria (Tanzania) (28): 38811 ± 35558, severe malaria (17): 388193 ± 186971, uncomplicated malaria (22):63714 ± 56422	Microscopy	ELISA
2	Hanisch et al., 2015	Cohort study	Uganda	NS	Cerebral malaria (75), uncomplicated malaria (67), healthy controls (62)	P. falciparum		4–12 years	NS	Cerebral malaria (75): 11.8 (8-21), uncomplicated malaria (67): 22.7 (14.1-36.4), healthy controls (62): 41.4 (31.6-57.4)	NS	Microscopy	ELISA
3	Musumeci et al., 2003	Prospective observational study	Burkina Faso	NS	Severe malaria (77), Uncomplicated malaria (28), healthy controls (40)	P. falciparum	Severe malaria (77): 13 (2–72) months, Uncomplicated malaria (28): 24 (9–144) months, healthy controls (40): 22 (10–100) months	Children	52.4	Severe malaria (77): 28.09 ± 22.39, Uncomplicated malaria (28): 20.92 ± 12.76, healthy controls (40): 6.4 ± 2.0	NS	Microscopy	ELISA
4	Olupot-Olupot et al., 2013	Prospective observational study	Kenya and Uganda	2009	Non-severe malaria (44), Severe malaria (30), Severe malaria & shock (126), died (10)	P. falciparum	Non-severe malaria (44): 2.52 (1.23-4.4), Severe malaria (30), 2.71 (1.29-4.8), Severe malaria & shock (126): 2.66 (1.23-4.02), died (10): NS	< 5	NS	Non-severe malaria (44): 467 (83–1371), Severe malaria (30), 453 (0–938), Severe malaria & shock (126): 510 (0–1101), died (10): 793 (0–1037)	NS	Microscopy/RDT	ELISA
5	Perkins et al., 2000	Prospective observational study	Gabon,	NS	Severe malaria (15), Uncomplicated malaria (19), Healthy controls (25)	P. falciparum	Severe malaria (15): 4.1 ± 0.7, Uncomplicated malaria (19): 4.9 ± 0.4, Healthy controls (25): 4.6 ± 0.6	Children	Severe malaria (15): 53.3, Uncomplicated malaria (19): 47.4, Healthy controls (25): 48	Severe malaria (15): 7.6 ± 0.5, Uncomplicated malaria (19): 9.1 ± 1.0, Healthy controls (25): 16.4 ± 1.2	Severe malaria (15): 273,546 ± 39,395, Uncomplicated malaria (19): 53,682 ± 10,988, Healthy controls (25): 54.3 ± 6.5	Microscopy	ELISA
6	Prakash et al., 2006	Prospective observational study	India	2001-2003	Severe malaria (14), Uncomplicated malaria (33), cerebral malaria (26), Healthy controls-endemic (15), Healthy controls-non-endemic (9)	P. falciparum	NS	5-75 years	NS	Cerebral malaria>severe malaria>uncomplicated malaria>endemic controls>non-endemic controls	NS	Microscopy	ELISA
7	Awandare et al., 2006	Prospective observational study	Gabon	NS	Uncomplicated malaria (23), controls (25)	P. falciparum	Uncomplicated malaria (23):4.9 ± 0.3), controls (25): 4.6 ± 0.6	2-8 years	NS	Uncomplicated malaria (23): 8 (6—11), controls (25): 16 (11—20)	90591.5	Microscopy	ELISA
8	Budiningsih et al., 2021	Cross-sectional study	Indonesia	NS	P. falciparum (26), P. vivax malaria (28): higher than controls, Mixed infection (14), healthy controls (27)	P. falciparum, P. vivax, mixed infection	Malaria (68): 20.2 (4–78), healthy controls (27): 29.5 (20–50)	4-78 years	Malaria (68): 61.8, healthy controls (27): 44.4	P. falciparum malaria (23): higher than controls, Mixed infection (14): higher than controls, P. vivax malaria (28): not difference from controls	NS	Microscopy/RDT	ELISA
9	Bwanika et al., 2018	Case-control study	Uganda	NS	Malaria (55), healthy controls (89)	P. falciparum	7.6 ± 3.0	Children	50	Malaria (55):772 pg/ml, healthy controls (89): 424.6 pg/ml	NS	Microscopy	ELISA
10	Hojo‑Souza et al., 2017	Cross-sectional study	Brazil	NS	Uncomplicated malaria (75), Endemic controls (10), healthy controls (15)	P. vivax	Uncomplicated malaria (75): 37 (20–80), Endemic controls (10): 38 (21–49), healthy controls (15): 27 (19–35)	19-80 years	NS	Uncomplicated malaria (75): median 42.8 pg/ mL, Endemic controls (10): median 48.9 pg/mL, healthy controls (15): median 10.3 pg/mL	NS	Microscopy/PCR	Bead-based assay
11	Nsubuga et al., 2019	Case-control study	Uganda	2013-2014	Uncomplicated malaria (28), healthy controls (30)	P. falciparum	Uncomplicated malaria (28): 25.1 ± 11.1, healthy controls (30): 36.4 ± 14.4	≥ 6 years	Uncomplicated malaria (28): 53.6, healthy controls (30): 46.7	Uncomplicated malaria (28):1434 pg/ml, healthy controls (30): 534.7 pg/ml	NS	Microscopy/PCR	ELISA
12	Scherer et al., 2016	Cross-sectional study	Brazil	NS	Uncomplicated malaria (37), healthy controls (42)	P. vivax	Uncomplicated malaria (37): 30.5 ± 10.52, healthy controls (42): 28.7 ± 8.12	Adults	Uncomplicated malaria (37): 62.2, healthy controls (42): 50	Uncomplicated malaria (37): 7.60 ± 6.60, healthy controls (42): 32.20 ± 8.90	1746.87	Microscopy	Bead-based assay
13	Wenisch et al., 1995	Prospective observational study	Thailand	NS	Uncomplicated malaria (37), healthy controls (17)	P. falciparum	Uncomplicated malaria (37): 25 ± 8.2, healthy controls (17): 25 ± 4.3	16-49 years	Uncomplicated malaria (37): 83.8, healthy controls (17): NS	Uncomplicated malaria (37): 14 ± 11, healthy controls (17): 63 ± 15	285487	Microscopy	ELISA

## Sheet: Sheet2
No	Author (year)	Mean_severe	SD_severe	N_severe	Mean_non	SD_non	N_non	mean_sym	SD_sym	N_sym	mean_asym	SD_asym	N_asym	Cmean	CSD	CN	Type of control	Malaria_mean	malaria_SD	Malaria_N
1	Acquah et al.,2016
2	Adegnika et al.,2006
3	Alfandari et al.,1996
4	Amah et al.,2011
5	Andrade et al.,2010	15.8	2.54	19	6.66	1.35	110							6.12	1.68	90	Healthy and febrile control
6	Aninagyei et al.,2021													0.75	0.23	120	Healthy control	1.74	0.19	80
7	Laval et al.,2014
8	Mast et al.,2010
9	Hollestelle et al.,2006	85.2	109	99	102.9	80.5	44							30.7	48.7	74	Febrile control
10	Huang et al.,2019
11	Kuna et al.,2015
12	NAIK et al.,1984
13	Paul et al., 2012
14	Righi et al.,2016	21.9	9.9	9	9.6	6.4	21
15	Yayan et al.,2017
16	Kremsner et al.,1996	137	71	29	47.1	41.7	64
17	Atkinson et al.,2015													1.08	0.34	452	Febrile control	3.07	3.52	70
18	Beesley et al.,2000
19	Conroy et al.,2011
20	Cruz et al.,2018
21	Cruz et al.,2019							18.1	7.5	141	7.6	1.69	127
22	Cusick et al.,2016	707.1	194.4	156										6.18	4.08	83	Healthy control
23	Czepiel et al.,2017
24	Epelboin et al., 2013
25	ERIKSSON et al., 1989													140.8	137.2	120	Febrile control	74.5	49.7	258
26	GJØRUP et al.,2007
27	Gyan et al.,2002	239.6	50.4	105	124.3	35.5	53
28	Kutsuna et al.,2014													22.68	9.88	116	Febrile control	53.4	8	86
29	Kutsuna et al.,2015
30	Leli et al.,2020													3.68	2.23	190	Febrile control	9.65	2.49	21
31	Mendonça et al., 2013	24.6	12.8	19				18	7.12	187	8.23	2.18	148	5.98	1.71	176	Healthy and febrile control
32	Wolfswinkel et al., 2013	226.3	118.7	61	123.8	91	259
33	Van Santen et al.,2011													18.8	9.57	39	Healthy control	31.9	13.3	30
34	Saad et al.,2012	76.2	21.4	32	57.6	17.1	32							22.6	6.73	32	Healthy control
35	Cercamondi et al.,2010
36	Cooper et al.,2014
37	Dongmo et al.,2011
38	BOZKURT et al.,2018
39	JAKOBSEN et al.,1998							66	17.9	27	18.3	13	32				Healthy control	1	0.61	40
40	Righetti et al.,2012
41	Reuling et al.,2018
42	Verhoef et al.,2001										12.5		15	6.8		76	Healthy control
43	Hoorn et al.,2012
44	Wolfswinke et al.,2012
